# Supplementary material for: Probing the Reaction Mechanisms of 3,5-Difluoro-2,4,6-Trinitroanisole (DFTNAN) through a Comparative Study with Trinitroanisole (TNAN)
Source: MDPI journal article supplement (doi:10.3390/ma15072568), 2022-03-31
Supplement: s1 [file s1]

# Probing the reaction mechanisms of 3,5-difluoro-2,4,6-trinitroanisole (DFTNAN) through a comparative study with trinitroanisole (TNAN)

Qingjie Jiao<sup>a</sup>, Tianqi Li<sup>a</sup>, Yapeng Ou<sup>a,\*</sup>, Suming Jing<sup>b</sup>, Fang Wang<sup>c,\*</sup>

<sup>a</sup> State Key Laboratory of Explosion Science and Technology, Beijing Institute of Technology, Beijing 100081, China

<sup>b</sup> School of Environment and Safety Engineering, North University of China, Taiyuan 030051, China

<sup>c</sup> Science and Technology on Aerospace Chemical Power Laboratory, Hubei Institute of Aerospace Chemotechnology, Xiangyang 441003, Hubei, China

## Figures

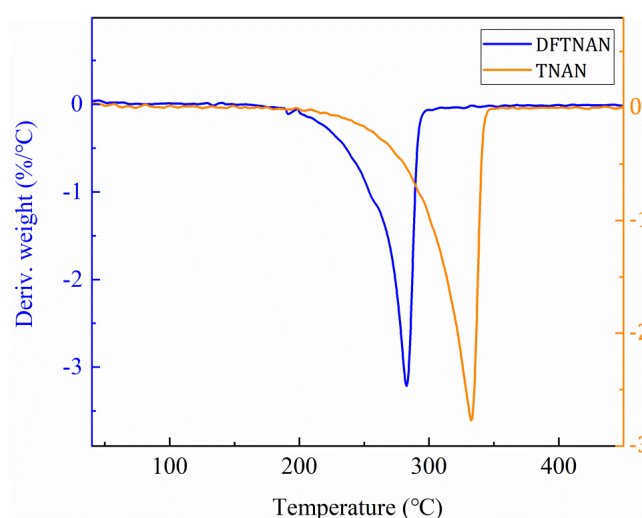

**Figure S1.** DTG curves of DFTNAN and TNAN.

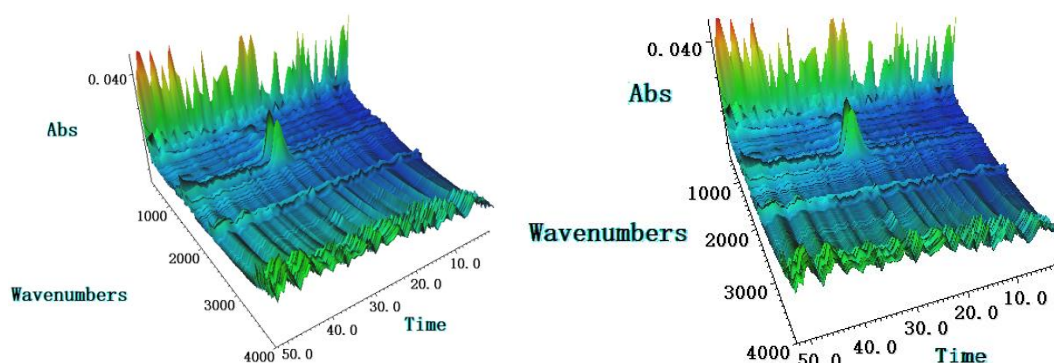

**Figure S2.** 3D FTIR spectrum of the pyrolysis gaseous products of DFTNAN and TNAN.

\* Corresponding authors at: Zhongguancun South Street No. 5 Yard, Haidian District, Beijing 100081, China  
E-mail addresses: ouyapeng@126.com (Y. Ou), 7520190083@bit.edu.cn (F. Wang).

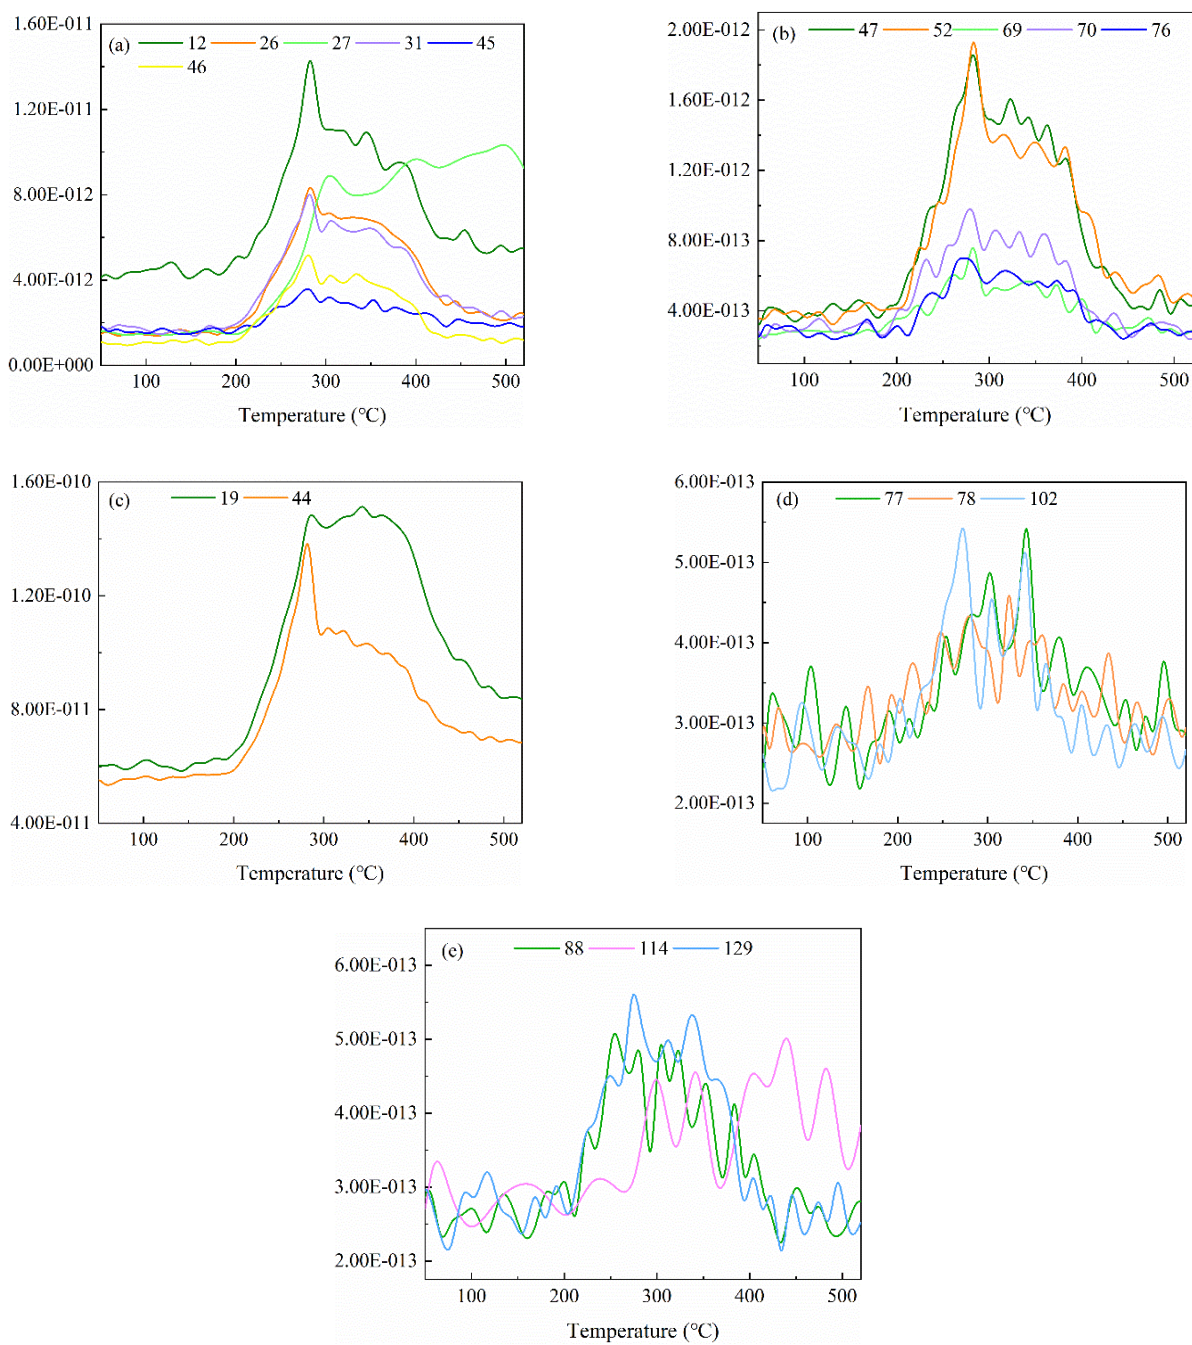

**Figure S3.** MS curves of the pyrolysis gaseous products of DFTNAN.

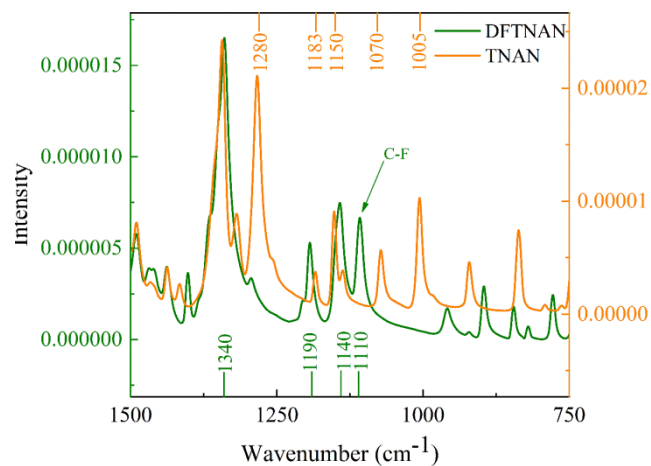

**Figure S4.** FTIR spectrum of the DFTNAN and TNAN

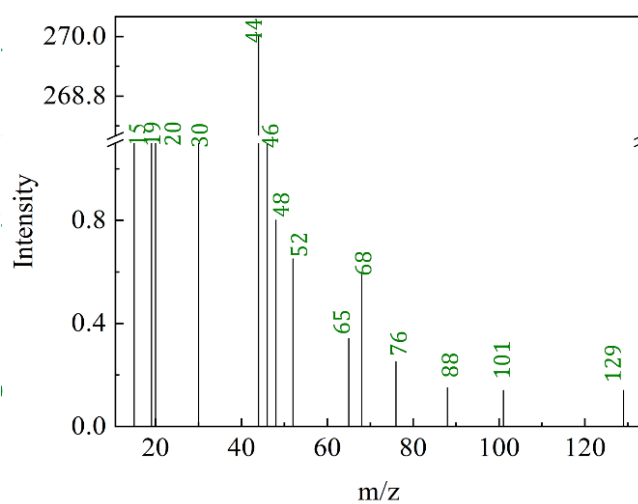

**Figure S5.** MS curves of the pyrolysis gaseous products of TNAN.

## Tables

**Table S1.** The m/z of Py-MS and possible assignments

| m/z | Possible assignments | m/z | Possible assignments                                                      |
|-----|----------------------|-----|---------------------------------------------------------------------------|
| 1   | H                    | 44  | CO <sub>2</sub> 、N <sub>2</sub> O                                         |
| 2   | H <sub>2</sub>       | 45  | COOH                                                                      |
| 12  | C                    | 46  | HCOOH,NO <sub>2</sub> ,C <sub>2</sub> FH, C <sub>2</sub> H <sub>6</sub> O |
| 14  | N                    | 47  | C <sub>2</sub> FH <sub>2</sub>                                            |
| 15  | CH <sub>3</sub>      | 48  | C <sub>2</sub> FH <sub>5</sub>                                            |
| 16  | O, CH <sub>4</sub>   | 50  | CF <sub>2</sub>                                                           |

|    |                                   |     |                                                   |
|----|-----------------------------------|-----|---------------------------------------------------|
| 17 | OH, NH <sub>3</sub>               | 52  | CH <sub>2</sub> F <sub>2</sub>                    |
| 18 | H <sub>2</sub> O, NH <sub>4</sub> | 64  | C <sub>2</sub> H <sub>2</sub> F <sub>2</sub>      |
| 19 | F                                 | 66  | CF <sub>2</sub> O                                 |
| 20 | HF                                | 68  | NOF <sub>2</sub>                                  |
| 26 | C <sub>2</sub> H <sub>2</sub>     | 69  | CF <sub>3</sub>                                   |
| 27 | HCN                               | 70  | CHF <sub>3</sub>                                  |
| 28 | CO, N <sub>2</sub>                | 76  | C <sub>3</sub> H <sub>2</sub> F <sub>2</sub>      |
| 30 | NO                                | 77  | C <sub>3</sub> F <sub>2</sub> H <sub>3</sub>      |
| 31 | CF                                | 78  | C <sub>3</sub> F <sub>2</sub> H <sub>4</sub>      |
| 32 | CH <sub>3</sub> OH                | 88  | CF <sub>4</sub> 、C <sub>5</sub> H <sub>12</sub> O |
| 33 | NF                                | 102 | C <sub>5</sub> H <sub>4</sub> F <sub>2</sub>      |
| 34 | CFH <sub>3</sub>                  | 114 | C <sub>6</sub> H <sub>4</sub> F <sub>2</sub>      |
| 38 | F <sub>2</sub>                    | 129 | C <sub>6</sub> H <sub>3</sub> F <sub>2</sub> O    |

**Table S2.** Gaseous products of DFTNAN after T-jump pyrolysis identified by GC-MS (Retention time with corresponding molecular structures).

| RT <sub>DFTNAN</sub> | m/z | Chemical                                                     | Structure                                                                           | RT <sub>DFTNAN</sub> | m/z | Chemical                                                      | Structure                                                                             |
|----------------------|-----|--------------------------------------------------------------|-------------------------------------------------------------------------------------|----------------------|-----|---------------------------------------------------------------|---------------------------------------------------------------------------------------|
| 1.5                  | 86  | C <sub>5</sub> H <sub>10</sub> O                             |   | 14.7                 | 175 | C <sub>6</sub> H <sub>3</sub> F <sub>2</sub> NO <sub>3</sub>  |   |
| 1.6                  | 52  | CH <sub>2</sub> F <sub>2</sub>                               |  | 15.3                 | 189 | C <sub>7</sub> H <sub>5</sub> F <sub>2</sub> NO <sub>3</sub>  |  |
| 2.2                  | 148 | C <sub>6</sub> H <sub>12</sub> O <sub>4</sub>                |  | 15.7                 | 214 | C <sub>11</sub> H <sub>6</sub> N <sub>2</sub> O <sub>3</sub>  |  |
| 3.1                  | 96  | C <sub>6</sub> H <sub>5</sub> F                              |  | 15.8                 | 234 | C <sub>10</sub> H <sub>6</sub> N <sub>2</sub> O <sub>5</sub>  |  |
| 3.4                  | 171 | C <sub>8</sub> H <sub>13</sub> NO <sub>3</sub>               |  | 15.9                 | 370 | C <sub>20</sub> H <sub>28</sub> F <sub>2</sub> O <sub>4</sub> |  |
| 9.5                  | 186 | C <sub>10</sub> H <sub>22</sub> N <sub>2</sub> O             |  | 16.3                 | 286 | C <sub>14</sub> H <sub>16</sub> F <sub>2</sub> O <sub>4</sub> |  |
| 9.6                  | 186 | C <sub>10</sub> H <sub>22</sub> N <sub>2</sub> O             |  | 16.6                 | 254 | C <sub>16</sub> H <sub>30</sub> O <sub>2</sub>                |  |
| 13.6                 | 234 | C <sub>10</sub> H <sub>6</sub> N <sub>2</sub> O <sub>5</sub> |  | 17.1                 | 198 | C <sub>7</sub> H <sub>6</sub> N <sub>2</sub> O <sub>5</sub>   |  |

|      |     |                    |                                                                                   |      |     |                   |                                                                                     |
|------|-----|--------------------|-----------------------------------------------------------------------------------|------|-----|-------------------|-------------------------------------------------------------------------------------|
| 13.8 | 252 | $C_{16}H_{16}N_2O$ | 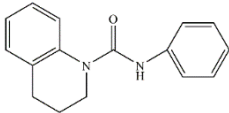 | 18.5 | 185 | $C_8H_{15}N_3O_2$ |  |
| 13.9 | 200 | $C_{12}H_{12}N_2O$ |  | 20.9 | 164 | $C_{12}H_{20}$    |  |

**Table S3.** Gaseous products of TNAN after T-jump pyrolysis identified by GC-MS (Retention time with corresponding molecular structures).

| $RT_{TNAN}$ | m/z | Chemical       | Structure                                                                            |
|-------------|-----|----------------|--------------------------------------------------------------------------------------|
| 10.9        | 123 | $C_6H_5NO_2$   | 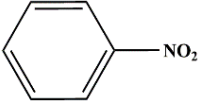   |
| 13.7        | 151 | $C_7H_5NO_3$   |    |
| 14.6        | 164 | $C_7H_4N_2O_3$ |    |
| 15.2        | 184 | $C_6H_4N_2O_5$ |  |
| 15.7        | 224 | $C_9H_8N_2O_5$ |  |
| 16.8        | 169 | $C_7H_7NO_4$   |  |
| 17.4        | 243 | $C_7H_5N_3O_7$ |  |
